# Supplementary material
Source: PubMed Central journal article supplement (PMC6210223)
Supplement: 4545_1_supp_47791_p1zpcc.pdf [file 4545_1_supp_47791_p1zpcc.pdf]

SUPPLEMENTAL MATERIAL

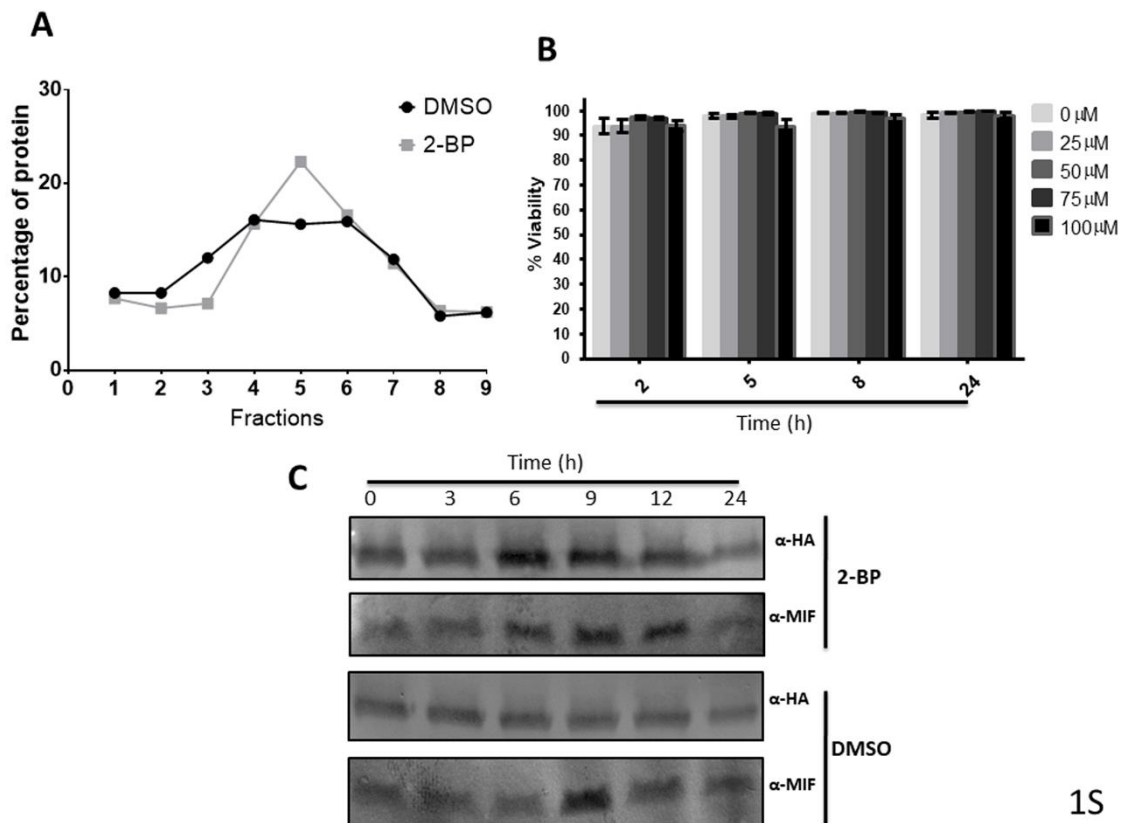

Figure 1.S

**Figure 1.S.**

(A) Signal quantification of the bands obtained in the density gradient fractionation (Fig. 5F). (B) Viability assay. Parasites were stained with propidium iodide after incubation with 2-BP palmitoylation inhibitor at the specified concentrations. Samples were taken at 2, 5, 8 and 24 h and analyzed by flow cytometry. Data are expressed as mean values  $\pm$  standard error of the mean (SEM) of four independent experiments. (C) Analysis of protein Stability. TvTSP8-HA transfected parasites were incubated with 100  $\mu$ M 2BP, or DMSO for 16 h, then protein translation was blocked with cycloheximide and samples of parasites were taken at the specified times. Parasites were lysed and proteins were separated by SDS-PAGE, transferred to PVDF membrane and immunoblotted using anti-HA or anti-MIF antibodies.

**Table 1.S.** Table 1.S. List of palmitoylated proteins identified by mass spectrometry. With NH<sub>2</sub>OH: treated with hydroxylamine; without NH<sub>2</sub>OH: not treated with hydroxylamine; ID: official gene symbol; lnNSAF: natural log of normalized spectral abundance factor; # TM Domain: number of transmembrane domains.

**Table 2.S.** Peptide identification data.
